# Supplementary material for: Exposure to common infections and risk of suicide and self-harm: a longitudinal general population study
Source: Springer Nature journal article supplement (doi:10.1007/s00406-020-01120-3), 2020-03-26
Supplement: MOESM1 [file 17834862]

## Supplementary material

### Lindgren et al. Exposure to common infections and risk of suicide and self-harm – a longitudinal general population study

**Table 4.** Multinomial logistic regression model of lifetime suicide attempts in the PIF subsample (n=694); all variables entered in the model simultaneously. The reference category is No suicide attempts.

|                                                      | One suicide attempt |               |             | Sig.         | Multiple suicide attempts |               |              | Sig.             |
|------------------------------------------------------|---------------------|---------------|-------------|--------------|---------------------------|---------------|--------------|------------------|
|                                                      | OR                  | 95% CI for OR |             |              | OR                        | 95% CI for OR |              |                  |
|                                                      |                     | Lower         | Upper       |              |                           | Lower         | Upper        |                  |
| Gender                                               |                     |               |             |              |                           |               |              |                  |
| Male                                                 | 1.30                | 0.67          | 2.56        | 0.440        | 0.91                      | 0.48          | 1.73         | 0.769            |
| Female                                               |                     |               |             |              |                           |               |              |                  |
| Age                                                  | 0.99                | 0.96          | 1.02        | 0.584        | <b>0.94</b>               | <b>0.92</b>   | <b>0.97</b>  | <b>&lt;0.001</b> |
| Education                                            |                     |               |             |              |                           |               |              |                  |
| Basic                                                | 0.59                | 0.25          | 1.38        | 0.224        | <b>6.44</b>               | <b>2.30</b>   | <b>18.02</b> | <b>&lt;0.001</b> |
| Secondary                                            | 0.76                | 0.33          | 1.73        | 0.508        | <b>2.92</b>               | <b>1.02</b>   | <b>8.41</b>  | <b>0.047</b>     |
| High                                                 |                     |               |             |              |                           |               |              |                  |
| Number of siblings                                   | 0.87                | 0.75          | 1.01        | 0.067        | 0.91                      | 0.80          | 1.04         | 0.182            |
| Region of residence in Finland                       |                     |               |             |              |                           |               |              |                  |
| Southern                                             | 0.49                | 0.16          | 1.50        | 0.209        | 0.80                      | 0.31          | 2.09         | 0.656            |
| Southwestern                                         | 0.51                | 0.12          | 2.19        | 0.366        | 0.90                      | 0.27          | 3.04         | 0.861            |
| Western                                              | 1.29                | 0.42          | 3.95        | 0.656        | 1.11                      | 0.38          | 3.24         | 0.848            |
| Eastern                                              | 1.87                | 0.66          | 5.31        | 0.242        | 1.18                      | 0.41          | 3.40         | 0.758            |
| Northern                                             |                     |               |             |              |                           |               |              |                  |
| Plate used in the assays                             |                     |               |             |              |                           |               |              |                  |
| Plate 0                                              | 0.94                | 0.47          | 1.90        | 0.863        | 1.07                      | 0.53          | 2.13         | 0.859            |
| Plate 1                                              |                     |               |             |              |                           |               |              |                  |
| Screen status                                        |                     |               |             |              |                           |               |              |                  |
| Screen-positive: suspicion of severe mental disorder | 3.26                | 0.97          | 11.01       | 0.057        | <b>4.27</b>               | <b>1.26</b>   | <b>14.45</b> | <b>0.020</b>     |
| Screen-negative: controls                            |                     |               |             |              |                           |               |              |                  |
| C-reactive protein                                   | <b>1.34</b>         | <b>1.09</b>   | <b>1.64</b> | <b>0.006</b> | <b>1.33</b>               | <b>1.10</b>   | <b>1.62</b>  | <b>0.004</b>     |
| CMV IgG seroprevalence                               |                     |               |             |              |                           |               |              |                  |
| Positive                                             | 2.24                | 0.65          | 7.75        | 0.202        | <b>0.40</b>               | <b>0.20</b>   | <b>0.83</b>  | <b>0.014</b>     |
| Negative                                             |                     |               |             |              |                           |               |              |                  |

Significant values in bold.

OR, odds ratio

CI, confidence interval

**Table 5.** Multinomial logistic regression model of lifetime suicide attempts in males in the PIF subsample (n=309); all variables entered in the model simultaneously. The reference category is No suicide attempts.

|                                                      | One suicide attempt |               |             | Multiple suicide attempts |             |               |              |                  |
|------------------------------------------------------|---------------------|---------------|-------------|---------------------------|-------------|---------------|--------------|------------------|
|                                                      | OR                  | 95% CI for OR |             | Sig.                      | OR          | 95% CI for OR |              | Sig.             |
|                                                      |                     | Lower         | Upper       |                           |             | Lower         | Upper        |                  |
| Age                                                  | 0.99                | 0.95          | 1.03        | 0.532                     | <b>0.90</b> | <b>0.86</b>   | <b>0.95</b>  | <b>&lt;0.001</b> |
| Education                                            |                     |               |             |                           |             |               |              |                  |
| Basic                                                | 1.32                | 0.39          | 4.43        | 0.657                     | <b>9.16</b> | <b>1.78</b>   | <b>47.08</b> | <b>0.008</b>     |
| Secondary                                            | 0.77                | 0.21          | 2.92        | 0.705                     | 2.77        | 0.52          | 14.60        | 0.231            |
| High                                                 |                     |               |             |                           |             |               |              |                  |
| Number of siblings                                   | 0.87                | 0.71          | 1.07        | 0.189                     | 1.01        | 0.84          | 1.22         | 0.911            |
| Region of residence in Finland                       |                     |               |             |                           |             |               |              |                  |
| Southern                                             | 0.42                | 0.08          | 2.28        | 0.316                     | 1.01        | 0.29          | 3.51         | 0.989            |
| Southwestern                                         | 0.52                | 0.08          | 3.56        | 0.508                     | 0.27        | 0.03          | 2.66         | 0.262            |
| Western                                              | 1.74                | 0.38          | 7.93        | 0.473                     | 0.85        | 0.19          | 3.80         | 0.826            |
| Eastern                                              | 2.40                | 0.55          | 10.43       | 0.244                     | 1.42        | 0.34          | 6.02         | 0.633            |
| Northern                                             |                     |               |             |                           |             |               |              |                  |
| Plate used in the assays                             |                     |               |             |                           |             |               |              |                  |
| Plate 0                                              | 1.61                | 0.52          | 4.94        | 0.406                     | 0.76        | 0.27          | 2.13         | 0.607            |
| Plate 1                                              |                     |               |             |                           |             |               |              |                  |
| Screen status                                        |                     |               |             |                           |             |               |              |                  |
| Screen-positive: suspicion of severe mental disorder | 2.16                | 0.57          | 8.17        | 0.256                     | 4.06        | 0.83          | 19.89        | 0.083            |
| Screen-negative: controls                            |                     |               |             |                           |             |               |              |                  |
| C-reactive protein                                   | 1.24                | 0.94          | 1.64        | 0.134                     | <b>1.40</b> | <b>1.07</b>   | <b>1.84</b>  | <b>0.015</b>     |
| EBV IgG antibody level                               | <b>2.13</b>         | <b>1.11</b>   | <b>4.09</b> | <b>0.024</b>              | 1.59        | 0.80          | 3.12         | 0.183            |

Significant values in bold.

OR, odds ratio

CI, confidence interval
